# Supplementary material for: Protective effects of the flavonoid fraction obtained from pomelo fruitlets through ultrasonic-associated microwave extraction against AAPH-induced erythrocyte hemolysis
Source: Royal Society of Chemistry journal article supplement (doi:10.1039/c9ra02523e), 2019-01-01
Supplement: c9ra02523e1.pdf [file c9ra02523e1.pdf]

s-Figure 1: The purified flavones fraction CF sample at absorbance wavelength of (A) 490 nm and (B) 510 nm isolated from the crude flavones fraction extracted in the pretreatment M400+U400 group treated with ultrasonic wave (400 W) associated with microwave (400 W) for 40 mins using AB-8 macroporous resin.

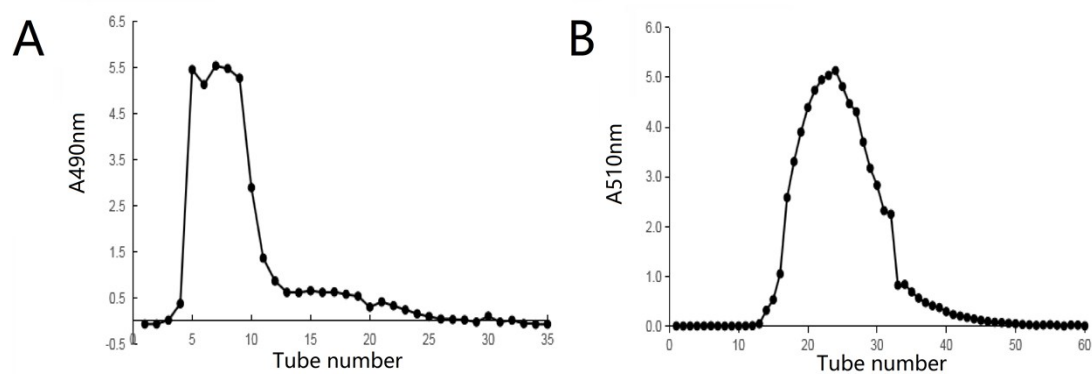

**s-Table 1 The characteristic description of the flavone compositions in the M400+U100 sample group based on PR-LCMS analysis**

| Chemical component                        | Chemical formula                                | Retention time (min) | m/z      | Error | Response value |
|-------------------------------------------|-------------------------------------------------|----------------------|----------|-------|----------------|
| Genistein-7,4'-di-O- $\beta$ -D-glucoside | C <sub>27</sub> H <sub>30</sub> O <sub>15</sub> | 2.55                 | 595.1666 | 0.9   | 11510          |
| Naringin                                  | C <sub>27</sub> H <sub>32</sub> O <sub>14</sub> | 3.2                  | 581.1863 | -0.2  | 379883         |
| 2''-O-Acetyl-3'-O-methylrutin             | C <sub>30</sub> H <sub>34</sub> O <sub>17</sub> | 3.4                  | 667.1881 | 1.3   | 130448         |
| 5,7,8,3'-Tetrahydroxy-3,4'-dimethoxy      | C <sub>17</sub> H <sub>14</sub> O <sub>8</sub>  | 3.55                 | 347.0745 | -1.6  | 29595          |

**s-Table 2 The characteristic description of the flavone compositions in the  
U400→M400 sample group based on PR-LCMS analysis**

| Chemical component                   | Chemical<br>formula                             | Retention<br>time (min) | m/z      | Error | Response<br>value |
|--------------------------------------|-------------------------------------------------|-------------------------|----------|-------|-------------------|
| Genistein-7,4'-di-O-β-D-glucoside    | C <sub>27</sub> H <sub>30</sub> O <sub>15</sub> | 2.53                    | 595.1664 | 0.6   | 12654             |
| Naringenin-4'-glucoside-7-rutinoside | C <sub>33</sub> H <sub>42</sub> O <sub>19</sub> | 2.69                    | 743.2399 | 0.6   | 8108              |
| Naringin                             | C <sub>27</sub> H <sub>32</sub> O <sub>14</sub> | 3.18                    | 581.1869 | 0.4   | 499539            |
| 2"-O-Acetyl-3'-O-methylrutin         | C <sub>30</sub> H <sub>34</sub> O <sub>17</sub> | 3.39                    | 667.1873 | 0.4   | 153917            |

**s-Table 3 The characteristic description of the flavone compositions in the Water  
Bath sample group based on PR-LCMS analysis**

| Chemical component                               | Chemical<br>formula                             | Retention<br>time (min) | m/z      | Error | Response<br>value |
|--------------------------------------------------|-------------------------------------------------|-------------------------|----------|-------|-------------------|
| Genistein-7,4'-di-O-β-D-glucoside                | C <sub>27</sub> H <sub>30</sub> O <sub>15</sub> | 2.53                    | 595.1664 | 0.7   | 35201             |
| Kaempferol-3-O-(2G-α-L-rhamnosyl)-<br>rutinoside | C <sub>33</sub> H <sub>40</sub> O <sub>19</sub> | 2.65                    | 741.2233 | -0.4  | 10779             |
| Naringenin-4'-glucoside-7-rutinoside             | C <sub>33</sub> H <sub>42</sub> O <sub>19</sub> | 2.69                    | 743.24   | 0.7   | 21640             |
| Naringin                                         | C <sub>27</sub> H <sub>32</sub> O <sub>14</sub> | 3.18                    | 581.1871 | 0.6   | 573260            |
| 2"-O-Acetyl-3'-O-methylrutin                     | C <sub>30</sub> H <sub>34</sub> O <sub>17</sub> | 3.39                    | 667.1886 | 1.7   | 287817            |
| 2"-O-Acetylrutin                                 | C <sub>29</sub> H <sub>32</sub> O <sub>17</sub> | 3.56                    | 653.1728 | 1.6   | 64167             |

**s-Table 4 The characteristic description of the flavone compositions in the M100+U400 sample group based on PR-LCMS analysis**

| Chemical component                        | Chemical formula                                | Retention time (min) | m/z      | Error | Response value |
|-------------------------------------------|-------------------------------------------------|----------------------|----------|-------|----------------|
| Genistein-7,4'-di-O- $\beta$ -D-glucoside | C <sub>27</sub> H <sub>30</sub> O <sub>15</sub> | 2.53                 | 595.165  | -0.8  | 6355           |
| Naringin                                  | C <sub>27</sub> H <sub>32</sub> O <sub>14</sub> | 3.18                 | 581.1873 | 0.8   | 372893         |
| 2"-O-Acetyl-3'-O-methylrutin              | C <sub>30</sub> H <sub>34</sub> O <sub>17</sub> | 3.38                 | 667.1877 | 0.9   | 85641          |
| 5,7,8,3'-Tetrahydroxy-3,4'-dimethoxy      | C <sub>17</sub> H <sub>14</sub> O <sub>8</sub>  | 3.55                 | 347.0745 | -1.6  | 60439          |

**s-Table 5 The characteristic description of the flavone compositions in the M400 sample group based on PR-LCMS analysis**

| Chemical component                        | Chemical formula                                | Retention time (min) | m/z      | Error | Response value |
|-------------------------------------------|-------------------------------------------------|----------------------|----------|-------|----------------|
| Genistein-7,4'-di-O- $\beta$ -D-glucoside | C <sub>27</sub> H <sub>30</sub> O <sub>15</sub> | 2.53                 | 595.1666 | 0.9   | 14218          |
| Naringin                                  | C <sub>27</sub> H <sub>32</sub> O <sub>14</sub> | 3.18                 | 581.1868 | 0.3   | 449671         |
| 2"-O-Acetyl-3'-O-methylrutin              | C <sub>30</sub> H <sub>34</sub> O <sub>17</sub> | 3.38                 | 667.1875 | 0.7   | 153757         |
| Xanthohumol                               | C <sub>21</sub> H <sub>22</sub> O <sub>5</sub>  | 6.72                 | 355.152  | -2    | 5145           |

**s-Table 6 The characteristic description of the flavone compositions in the  
M400→U400 sample group based on PR-LCMS analysis**

| Chemical component                   | Chemical<br>formula                             | Retention<br>time (min) | m/z      | Error | Response<br>value |
|--------------------------------------|-------------------------------------------------|-------------------------|----------|-------|-------------------|
| Genistein-7,4'-di-O-β-D-glucoside    | C <sub>27</sub> H <sub>30</sub> O <sub>15</sub> | 2.53                    | 595.1654 | -0.4  | 13659             |
| Naringenin-4'-glucoside-7-rutinoside | C <sub>33</sub> H <sub>42</sub> O <sub>19</sub> | 2.69                    | 743.2404 | 1.1   | 8338              |
| Naringin                             | C <sub>27</sub> H <sub>32</sub> O <sub>14</sub> | 3.18                    | 581.1871 | 0.6   | 488164            |
| 2"-O-Acetyl-3'-O-methylrutin         | C <sub>30</sub> H <sub>34</sub> O <sub>17</sub> | 3.38                    | 667.187  | 0.1   | 153231            |

**s-Table 7 The characteristic description of the flavone compositions in the U400 sample group based on PR-LCMS analysis**

| Chemical component                        | Chemical formula                                | Retention time (min) | m/z      | Error | Response value |
|-------------------------------------------|-------------------------------------------------|----------------------|----------|-------|----------------|
| Genistein-7,4'-di-O- $\beta$ -D-glucoside | C <sub>27</sub> H <sub>30</sub> O <sub>15</sub> | 2.53                 | 595.1662 | 0.4   | 21501          |
| Naringenin-4'-glucoside-7-rutinoside      | C <sub>33</sub> H <sub>42</sub> O <sub>19</sub> | 2.69                 | 743.2399 | 0.6   | 12972          |
| Naringin                                  | C <sub>27</sub> H <sub>32</sub> O <sub>14</sub> | 3.18                 | 581.1862 | -0.3  | 536799         |
| 2''-O-Acetyl-3'-O-methylrutin             | C <sub>30</sub> H <sub>34</sub> O <sub>17</sub> | 3.38                 | 667.187  | 0.2   | 264773         |



**s-Table 8 The characteristic description of the flavone compositions in the M400+U400-30 sample group based on PR-LCMS analysis**

| Chemical component                   | Chemical formula                                | Retention time (min) | m/z      | Error | Response value |
|--------------------------------------|-------------------------------------------------|----------------------|----------|-------|----------------|
| Naringin                             | C <sub>27</sub> H <sub>32</sub> O <sub>14</sub> | 3.18                 | 581.1865 | 0     | 76656          |
| 2"-O-Acetyl-3'-O-methylrutin         | C <sub>30</sub> H <sub>34</sub> O <sub>17</sub> | 3.38                 | 667.1872 | 0.4   | 11505          |
| 5,7,8,3'-Tetrahydroxy-3,4'-dimethoxy | C <sub>17</sub> H <sub>14</sub> O <sub>8</sub>  | 3.55                 | 347.0753 | -0.8  | 64167          |
| (3R)-Duartin                         | C <sub>18</sub> H <sub>20</sub> O <sub>6</sub>  | 5.04                 | 333.1314 | 0.9   | 13173          |

**s-Table 9 The characteristic description of the flavone compositions in the M400+U400-40 sample group based on PR-LCMS analysis**

| Chemical component                        | Chemical formula                                | Retention time (min) | m/z      | Error | Response value |
|-------------------------------------------|-------------------------------------------------|----------------------|----------|-------|----------------|
| Genistein-7,4'-di-O- $\beta$ -D-glucoside | C <sub>27</sub> H <sub>30</sub> O <sub>15</sub> | 2.53                 | 595.1668 | 1     | 29156          |
| Naringin                                  | C <sub>27</sub> H <sub>32</sub> O <sub>14</sub> | 3.18                 | 581.1863 | -0.2  | 572478         |
| 2"-O-Acetyl-3'-O-methylrutin              | C <sub>30</sub> H <sub>34</sub> O <sub>17</sub> | 3.38                 | 667.788  | 1.2   | 100598         |
| 5,7,8,3'-Tetrahydroxy-3,4'-dimethoxy      | C <sub>17</sub> H <sub>14</sub> O <sub>8</sub>  | 3.55                 | 347.0752 | -0.9  | 418181         |
| (3R)-Duartin                              | C <sub>18</sub> H <sub>20</sub> O <sub>6</sub>  | 5.12                 | 333.1324 | -0.9  | 50422          |
